# Supplementary material
Source: HighWire-hosted journal article supplement (https://gut.bmj.com/content/69/9/1620)

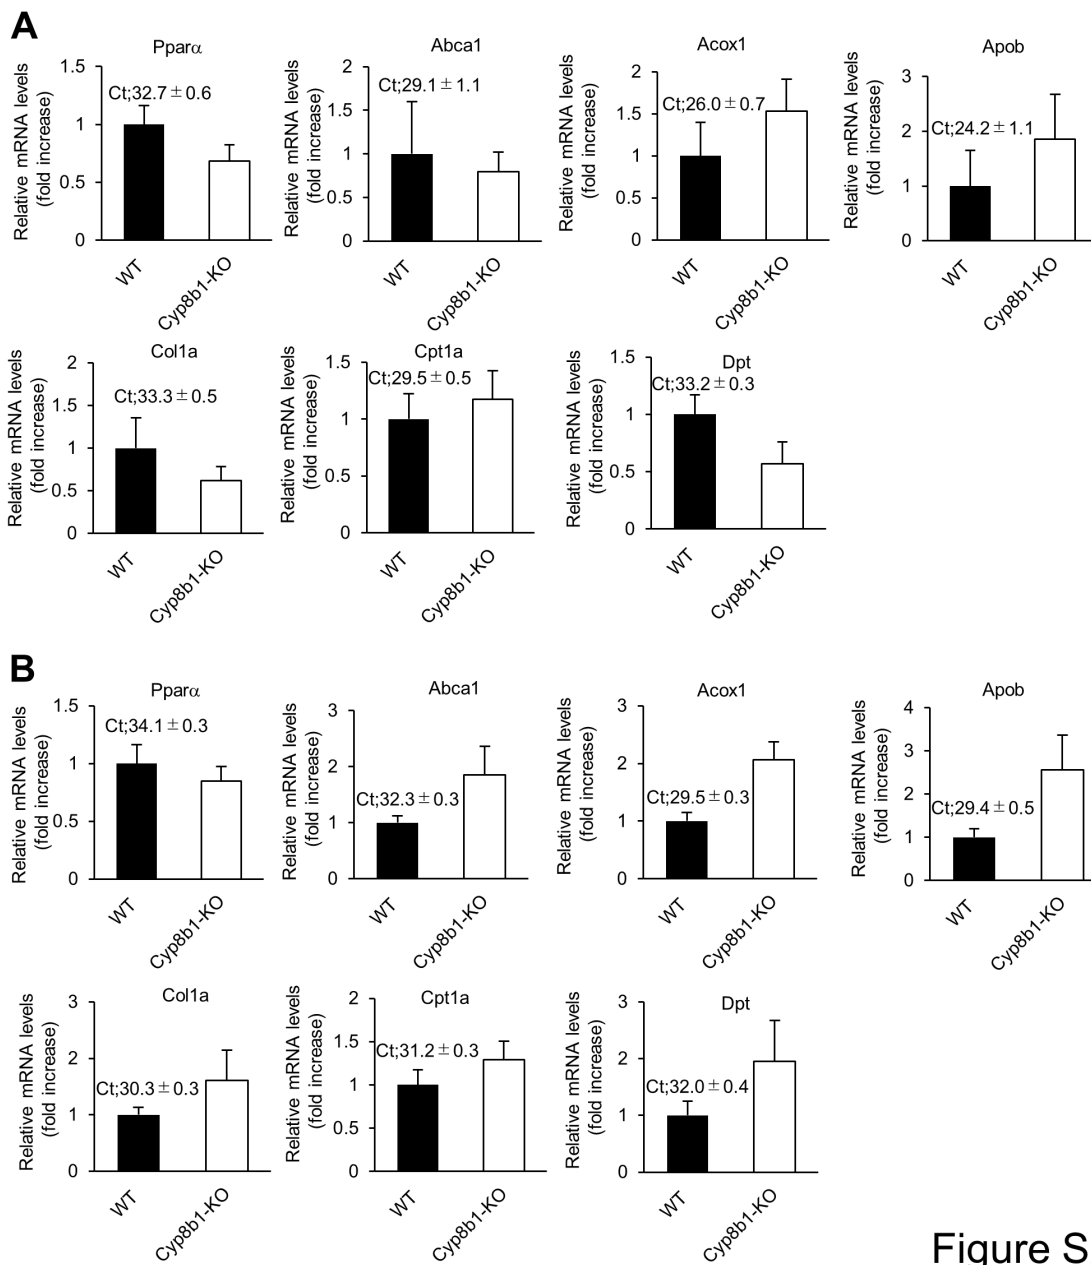

Figure S2

Supplement: inline-supplementary-material-3 [file inline-supplementary-material-3.pdf]

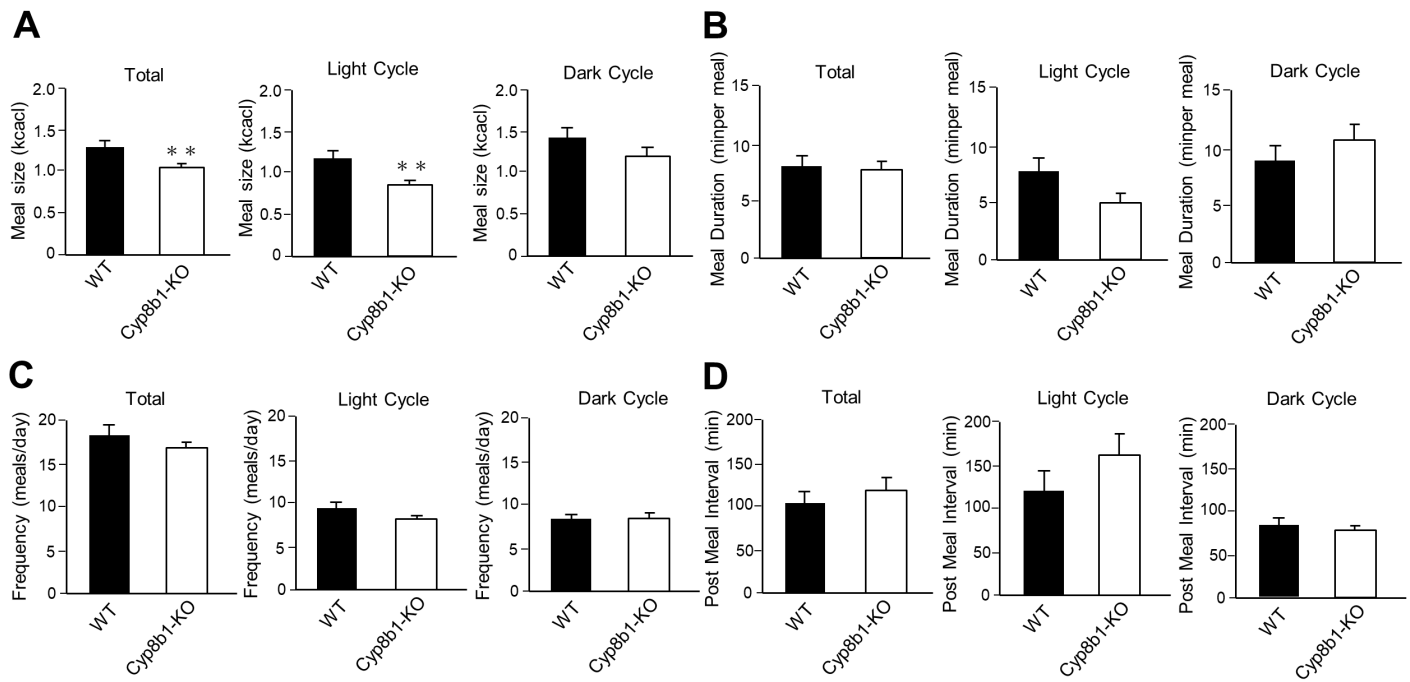

Figure S3

Supplement: inline-supplementary-material-4 [file inline-supplementary-material-4.pdf]

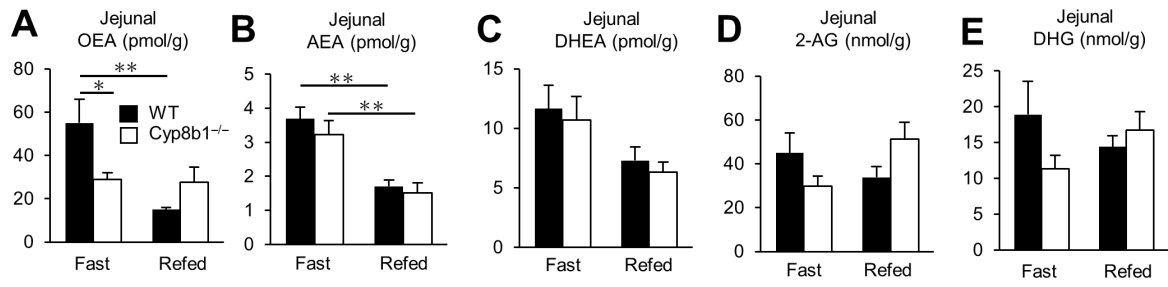

Figure S4

Supplement: inline-supplementary-material-5 [file inline-supplementary-material-5.pdf]

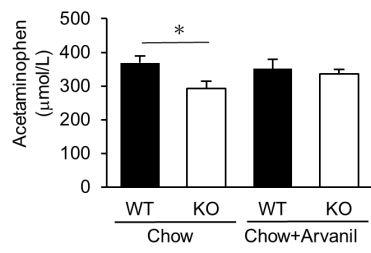

Figure S5

Supplement: inline-supplementary-material-6 [file inline-supplementary-material-6.pdf]

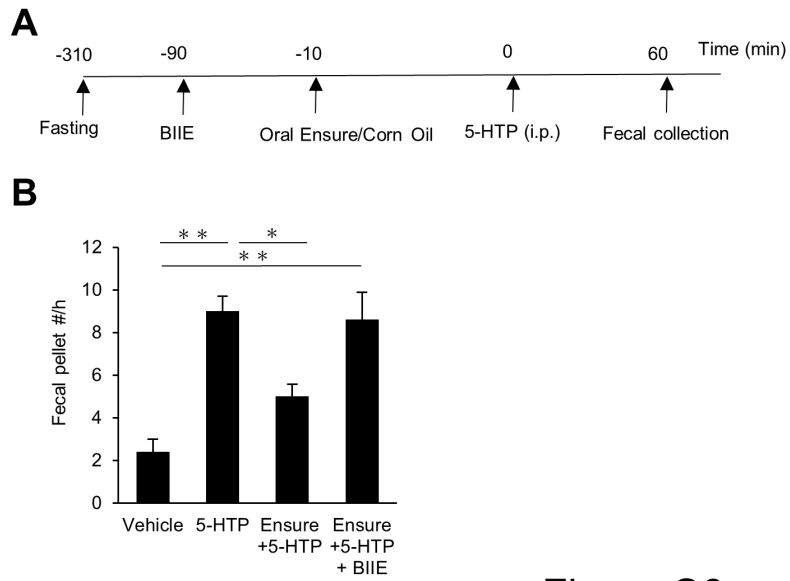

Figure S6

Supplement: inline-supplementary-material-7 [file inline-supplementary-material-7.pdf]

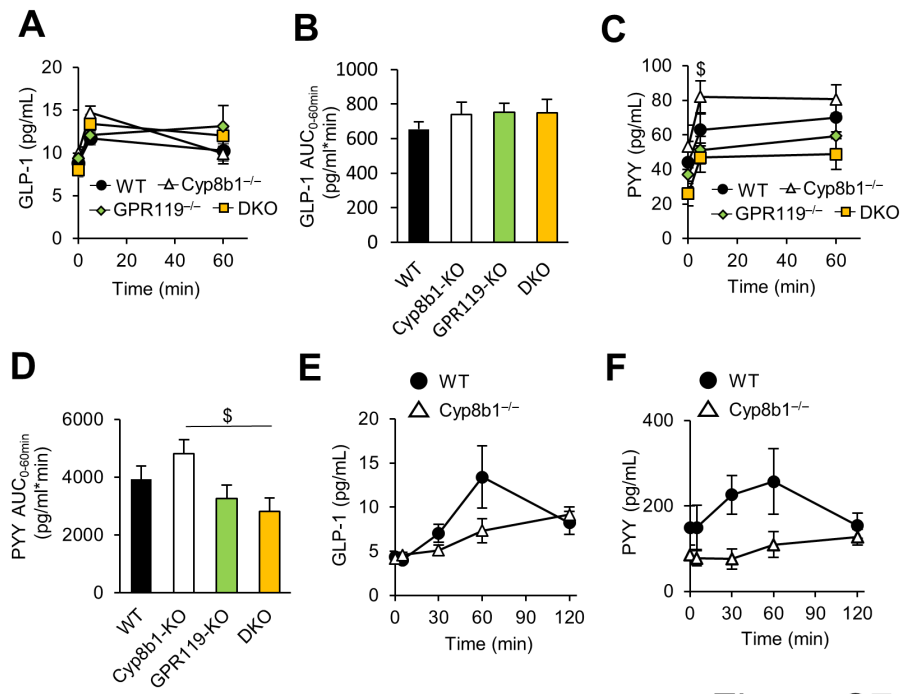

Figure S7

Supplement: inline-supplementary-material-8 [file inline-supplementary-material-8.pdf]

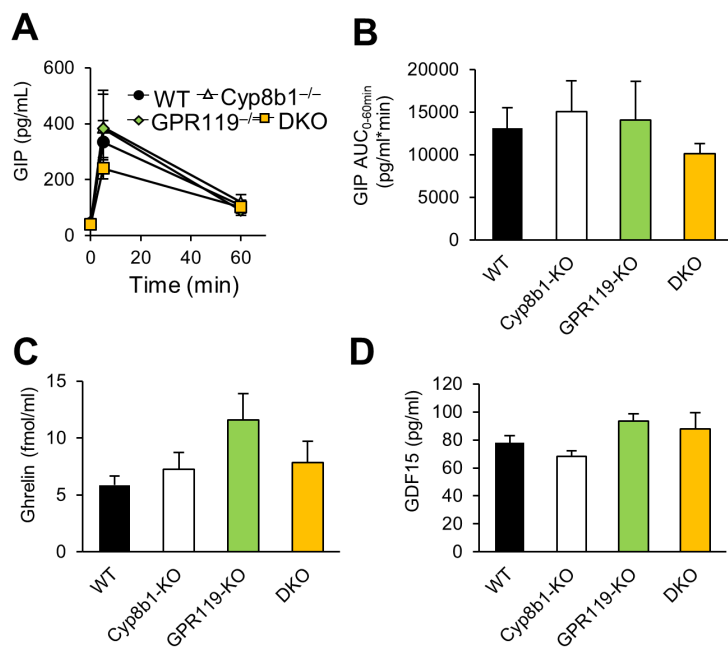

Figure S8

Supplement: inline-supplementary-material-9 [file inline-supplementary-material-9.pdf]
